# Supplementary material for: Unlocking the pharmacological potential of Brennnesselwurzel (Urtica dioica L.): an in-depth study on multifaceted biological activities
Source: PubMed Central journal article supplement — BMC Complement Med Ther. 2024 Dec 18;24:413. doi: 10.1186/s12906-024-04709-6 (PMC11653956; doi:10.1186/s12906-024-04709-6), 2024-12-18
Supplement: 12906_2024_4709_MOESM1_ESM.pdf [file 12906_2024_4709_MOESM1_ESM.pdf]

# Supporting Information

**Unlocking the Pharmacological Potential of Brennnesselwurzel (*Urtica dioica***

**L.): An In-depth Study on Multifaceted Biological Activities**

**Table S1:** List of amino acid detected in BWE extract by Amino Acid Analyzer.

|    | <b>Compound Name</b> | <b>Abbreviation</b> | <b>Retention Time<br/>[min]</b> | <b>Response</b> | <b>Amount<br/>[PPM]</b> |
|----|----------------------|---------------------|---------------------------------|-----------------|-------------------------|
| 1  | Aspartic acid        | ASP                 | 8.360                           | 11145.657       | 22.331                  |
| 2  | Threonine            | THR                 | 10.165                          | 4659.031        | 8.303                   |
| 3  | Serine               | SER                 | 10.845                          | 5887.113        | 10.321                  |
| 4  | Glutamic acid        | GLU                 | 12.112                          | 19745.279       | 48.613                  |
| 5  | Glycine              | GLY                 | 17.184                          | 5899.240        | 7.201                   |
| 6  | Alanine              | ALA                 | 18.301                          | 7237.286        | 10.639                  |
| 7  | Cysteine             | CYS                 | 20.573                          | 357.891         | 0.995                   |
| 8  | Valine               | VAL                 | 21.424                          | 9695.650        | 14.941                  |
| 9  | Methionine           | MET                 | 23.672                          | 885.981         | 1.815                   |
| 10 | Isoleucine           | ILE                 | 25.712                          | 6247.394        | 12.275                  |
| 11 | Leucine              | LEU                 | 26.931                          | 10920.189       | 21.496                  |
| 12 | Tyrosine             | TYR                 | 29.651                          | 2834.712        | 8.138                   |
| 13 | Phenylalanine        | PHE                 | 31.128                          | 4468.409        | 11.895                  |
| 14 | Histidine            | HIS                 | 35.629                          | 3812.604        | 8.845                   |
| 15 | Lysine               | LYS                 | 38.619                          | 8997.873        | 19.393                  |
| 16 | Ammonia              | -                   | 40.781                          | 31593.540       | 14.861                  |
| 17 | Arginine             | ARG                 | 42.560                          | 5066.743        | 16.080                  |
| 18 | Proline              | PRO                 | 13.856                          | 2927.452        | 16.579                  |

**Table S2:** List of flavonoids detected by HPLC analysis in BWE extract.

| <b>Retention Time<br/>[min]</b> | <b>Compound Name</b> | <b>Concentration<br/>[µg/gm]</b> |
|---------------------------------|----------------------|----------------------------------|
| 5.0                             | Rutin                | 5.22                             |
| 7.0                             | Querstin             | 4.10                             |
| 8.0                             | Kampferol            | 2.03                             |
| 9.0                             | Luteolin             | 13.71                            |
| 10.0                            | Apegenin             | 3.89                             |
| 12.0                            | Catechin             | 14.63                            |

**Table S3:** List of phenolics detected by HPLC analysis in BWE extract.

| <b>Retention Time<br/>[min]</b> | <b>Compound Name</b> | <b>Concentration<br/>[µg/gm]</b> |
|---------------------------------|----------------------|----------------------------------|
| 4.0                             | Catechol             | 14.22                            |
| 5.0                             | Syringenic           | 11.38                            |
| 7.0                             | Cinnamic             | 6.74                             |
| 8.0                             | Caffeic              | 6.81                             |
| 9.3                             | Pyrogallol           | 3.56                             |
| 11.0                            | Ferulic              | 7.02                             |
| 12.0                            | Salicylic            | 2.10                             |

**Table S4:** List of fat-soluble vitamins detected by HPLC analysis in BWE extract.

| <b>Retention Time<br/>[min]</b> | <b>Compound Name</b> | <b>Concentration<br/>[µg/gm]</b> |
|---------------------------------|----------------------|----------------------------------|
| 6.2                             | Vitamin D            | 7.63                             |
| 7.9                             | Vitamin K            | 12.56                            |
| 9.0                             | Retinol              | 10.66                            |

**Table S5:** List of water-soluble vitamins detected by HPLC analysis in BWE extract.

| <b>Retention Time<br/>[min]</b> | <b>Compound Name</b> | <b>Concentration<br/>[µg/gm]</b> |
|---------------------------------|----------------------|----------------------------------|
| 2.0                             | Vitamin C            | 1.55                             |
| 3.0                             | Vitamin B2           | 11.20                            |
| 5.0                             | Vitamin B6           | 5.33                             |
| 6.0                             | Vitamin B1           | 6.25                             |
| 7.0                             | Vitamin B3           | 9.80                             |

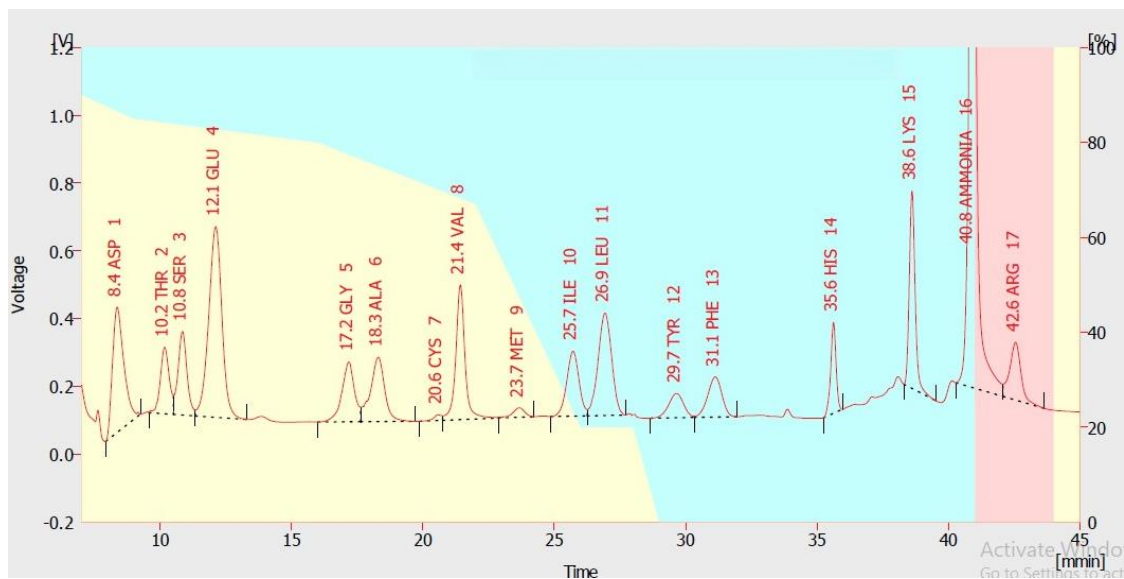

**Figure S1:** Chromatogram of amino acids detected in the BWE extract by amino acid analyzer.

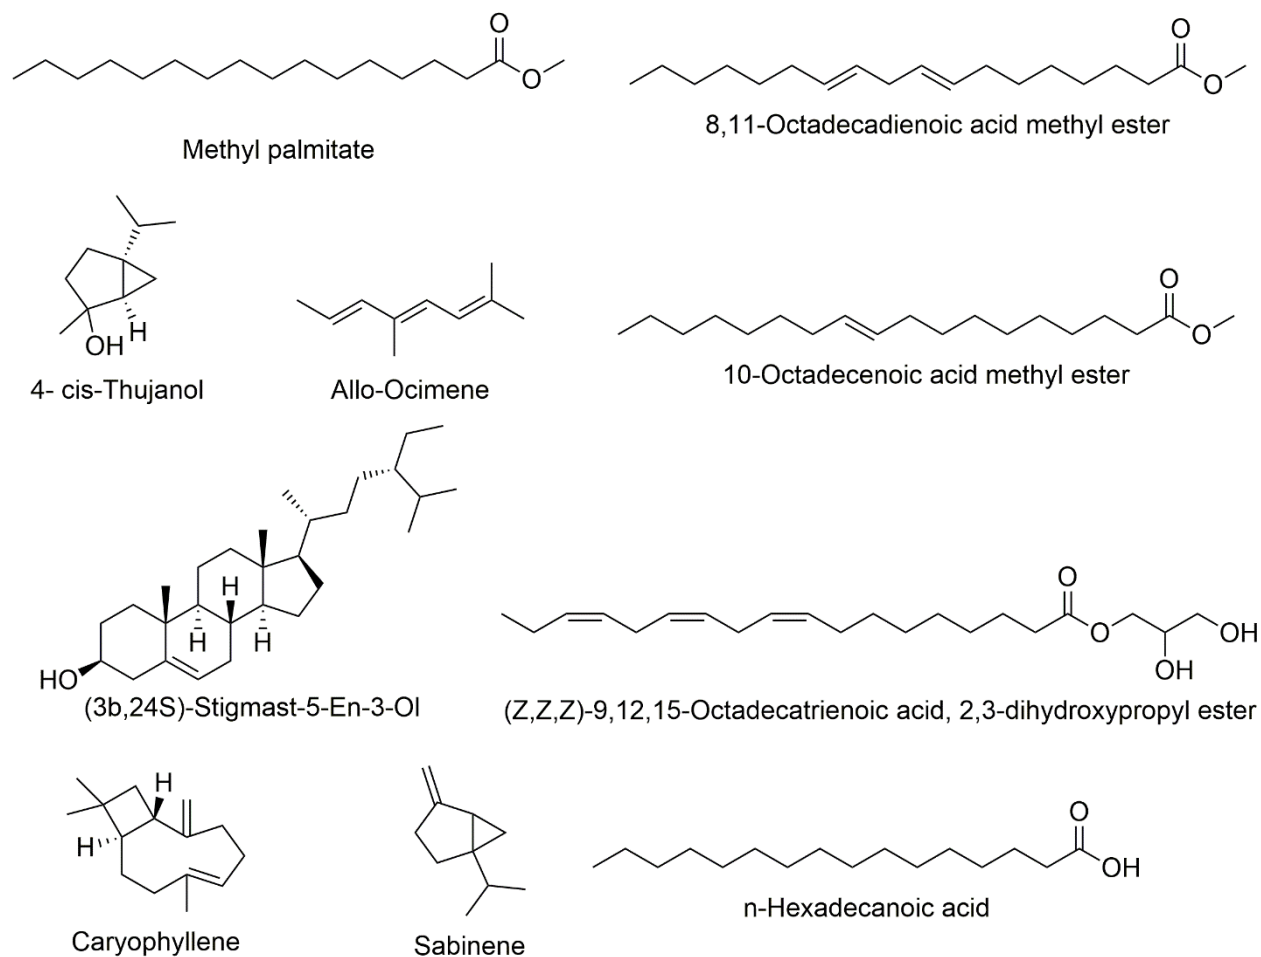

**Figure S2:** Representative metabolites predominantly detected in the BWE extract by GC-MS analysis.
